# Supplementary material for: Size-controlled synthesis of MCM-49 zeolites and their application in liquid-phase alkylation of benzene with ethylene
Source: Royal Society of Chemistry journal article supplement (doi:10.1039/c4ra15470c), 2015-01-01
Supplement: c4ra15470c1.pdf [file c4ra15470c1.pdf]

**Size-controlled synthesis of MCM-49 zeolites and their  
application in liquid-phase alkylation of benzene with ethylene**

Yanchun Shi, Enhui Xing, Wenhua Xie, Fengmei Zhang\*, Xuhong Mu and  
Xingtian Shu

State Key Laboratory of Catalytic Materials and Reaction Engineering, Research  
Institute of Petroleum Processing, Sinopec, Beijing 100083, China

\*Corresponding author: Prof. Fengmei Zhang

Address: Research Institute of Petroleum Processing Sinopec, Xueyuan Road 18,  
Beijing, China.

Tel: +86 010-82368698

E-mail: [zhangfm.ripp@sinopec.com](mailto:zhangfm.ripp@sinopec.com) (F. M. Zhang)

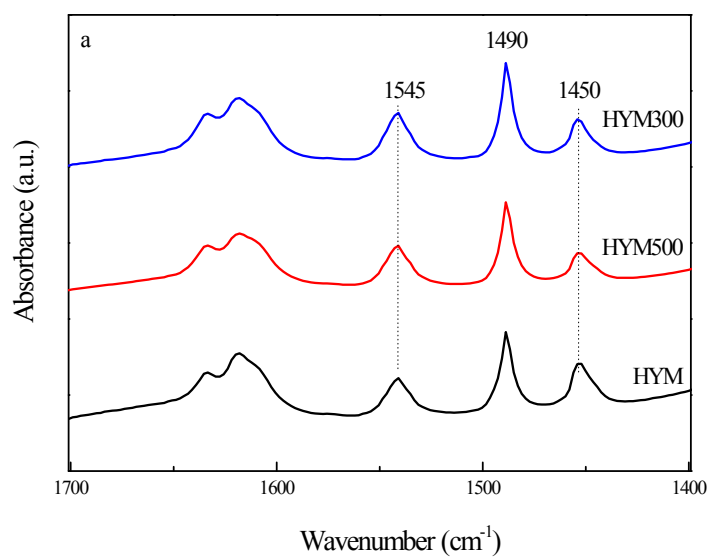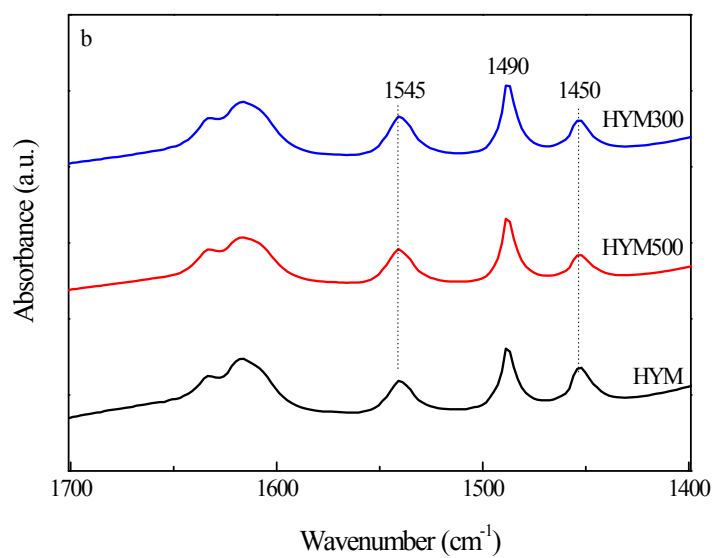

Fig. S1 Py-FTIR spectra of H-type zeolites at 200 °C (a) and 350 °C (b)

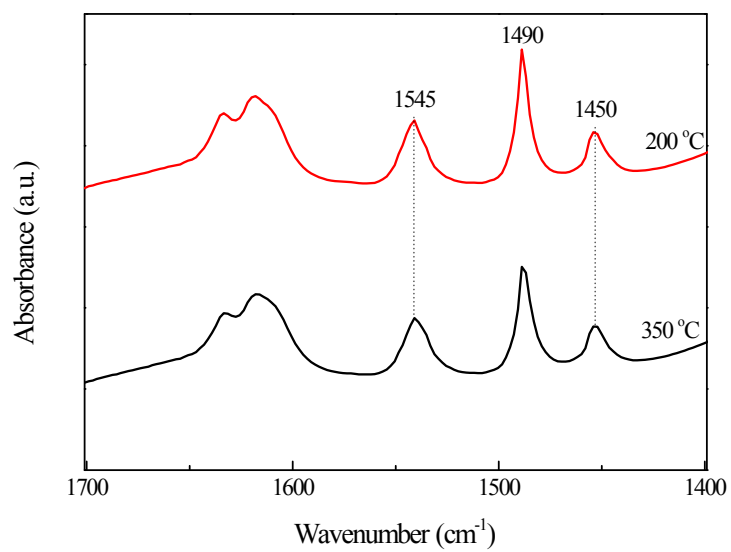

Fig. S2 Py-FTIR spectra of conventional H-MCM-49 zeolites
